# Supplementary figures and images for: Achieving solubility alteration with functionalized polydimethylsiloxane for improving the viscosity of supercritical CO2 fracturing fluids
Source: Royal Society of Chemistry journal article supplement (doi:10.1039/d1ra02069b), 2021-01-01

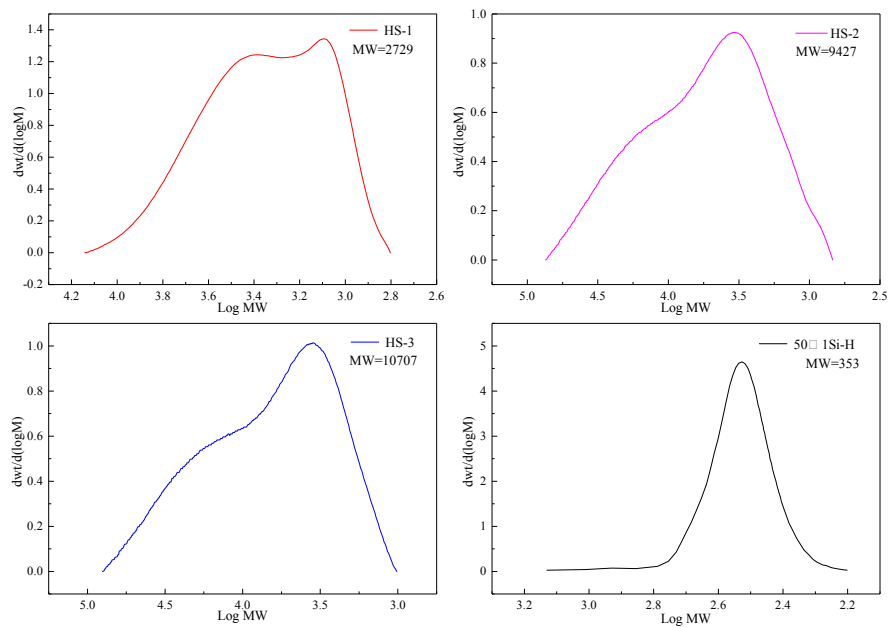

Fig.S1 GPC spectrum of HS series thickener

Supplement: d1ra02069b1.pdf [file d1ra02069b1.pdf]
